# Supplementary material
Source: PubMed Central journal article supplement (PMC6325631)
Supplement: NIHMS996519-supplement-supp_table.pdf [file NIHMS996519-supplement-supp_table.pdf]

Supplemental table. Safety outcomes definitions

| <b>Safety Outcomes</b>                                        | <b>ICD-9 codes</b> | <b>Risk Window</b>                            | <b>Additional Inclusion Criteria</b>                                                  |
|---------------------------------------------------------------|--------------------|-----------------------------------------------|---------------------------------------------------------------------------------------|
| <b>Maternal</b>                                               |                    |                                               |                                                                                       |
| Gestational hypertension                                      | 642.3x<br>642.9    | 20 weeks gestation through pregnancy end date | 2 outpatient diagnoses or 1 inpatient diagnosis; onset on or after 20 weeks gestation |
| Gestational diabetes                                          | 648.8x             | During pregnancy period                       |                                                                                       |
| Preeclampsia/eclampsia                                        | 642.4x-642.8x      | During pregnancy period                       | 2 outpatient diagnoses or 1 inpatient diagnosis                                       |
| Cesarean delivery                                             | 763.4x             | At delivery                                   |                                                                                       |
| <b>Infant</b>                                                 |                    |                                               |                                                                                       |
| Pre-term birth (<37 weeks)                                    | ---                | At delivery                                   |                                                                                       |
| Low birth weight (<2500 grams)                                | ---                | At delivery                                   |                                                                                       |
| Small for gestational age (i.e. <10 <sup>th</sup> percentile) | ---                | At delivery                                   | Implausible values; <300g and >6000g or <22 weeks or >44 weeks                        |

Abbreviations: ICD-9, International Classification of Diseases- 9<sup>th</sup> edition; ---: ICD-9 not used  
Safety of hepB vaccination during pregnancy
